# Supplementary material for: MXRA7 is involved in megakaryocyte differentiation and platelet production
Source: PubMed Central journal article supplement (PMC10400050; doi:10.1097/bs9.0000000000000167), 2023-07-05
Supplement: bs9-5-160-s001.pdf [file bs9-5-160-s001.pdf]

**Table S1. Primer sequences used for RT-qPCR.**

| <b>Gene</b>            | <b>Primer sequence</b>                                                         |
|------------------------|--------------------------------------------------------------------------------|
| GATA-1 (mouse)         | Forward: 5'-ACTCCTCCTGGTCCGAATGC-3'<br>Reverse: 5'-GCCCTAGACCAGGAAAATCC-3'     |
| FOG-1 (mouse)          | Forward: 5'-GGACTGCTATATGTGCGCCT-3'<br>Reverse: 5'-ACCAGATCCCGCAGTCTTTG-3'     |
| PU-1 (mouse)           | Forward: 5'-ACCTTCCAGTTCTCGTCC-3'<br>Reverse: 5'-CTGTCTTGCCGTAGTTGC-3'         |
| NF-E2 (mouse)          | Forward: 5'-TTGGAATCCGCCACAGGTTG-3'<br>Reverse: 5'-ACCCTGCAGCTCAGTAATGG-3'     |
| $\beta$ -actin (mouse) | Forward: 5'-GCTCCTAGCACCATGAAGAT-3'<br>Reverse: 5'-GTGTAAAACGCAGCTCAGTA-3'     |
| MXRA7 (human)          | Forward: 5'-GCTGAGGGGAAACCAGTACA -3'<br>Reverse: 5'-CGGACATCTCGCCAAACG -3'     |
| $\beta$ -actin (human) | Forward: 5'-CTCACCATGGATGATGATATCGC-3'<br>Reverse: 5'-AGGAATCCTTCTGACCCATGC-3' |

|
