# Supplementary material for: MXRA7 is involved in megakaryocyte differentiation and platelet production
Source: PubMed Central journal article supplement (PMC10400050; doi:10.1097/bs9.0000000000000167), 2023-07-05
Supplement: bs9-5-160-s002.pdf [file bs9-5-160-s002.pdf]

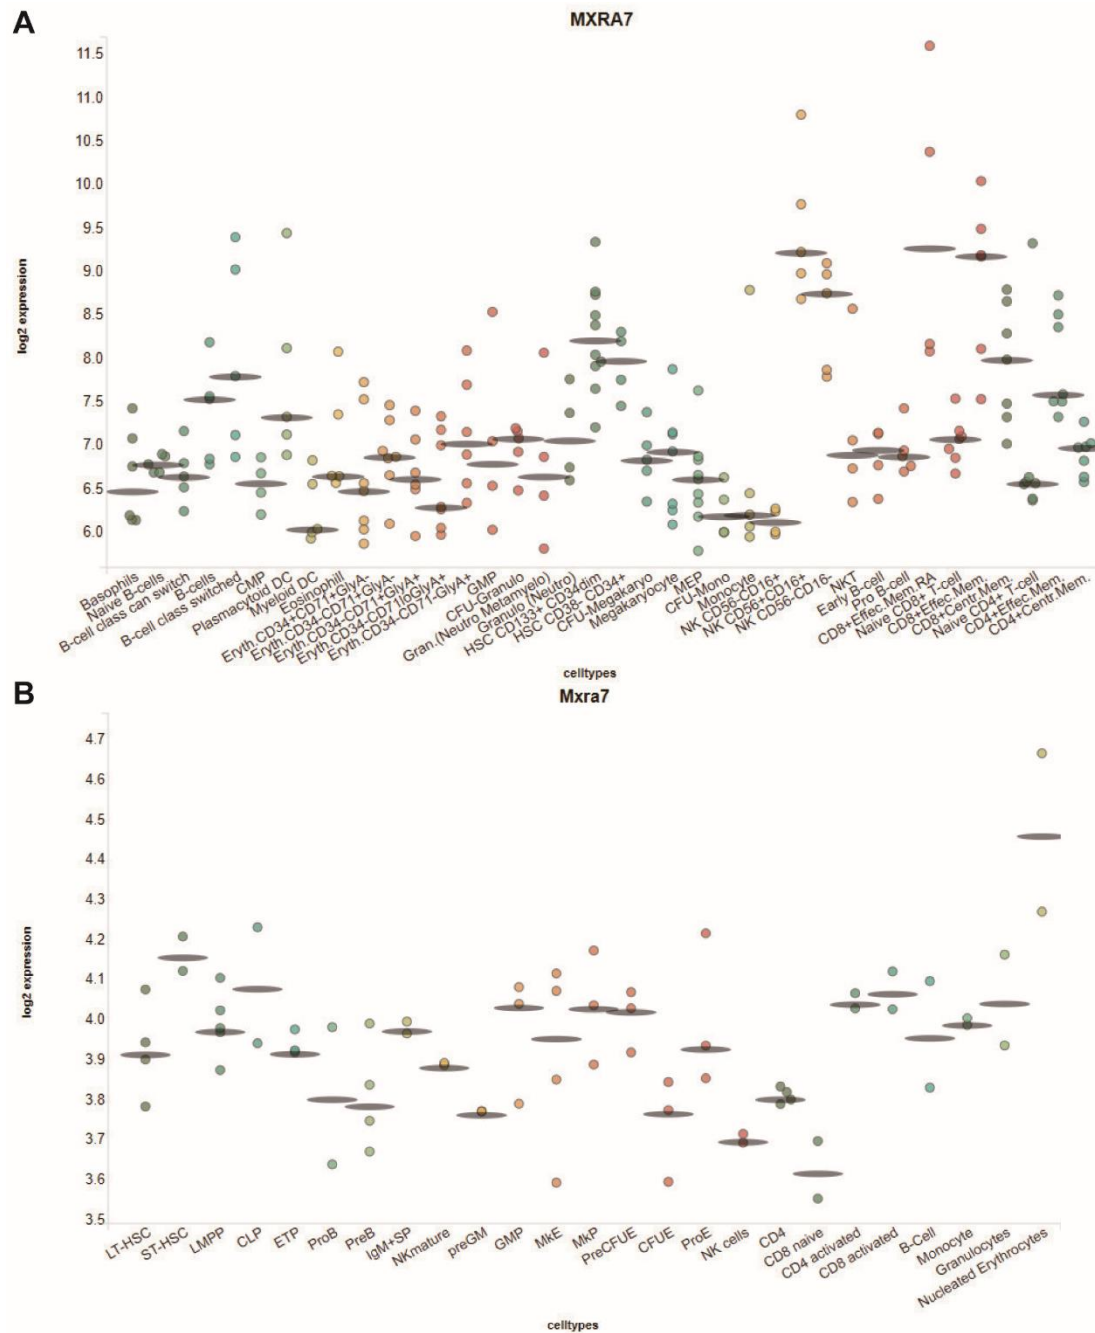

**Figure S1. The expression of MXRA7 mRNA in databank of Bloodspot program.**

The atlases were the direct outputs of Bloodspot program for "Normal human hematopoiesis (DMAP)" (A) and "Mouse normal hematopoietic system" (B). Y axis values were the absolute expression levels in log<sub>2</sub> formats for the "Max probe", herein 212509\_s\_at (A) and 1453855\_at (B). The grey spindles indicated the median value of each group. Details of data and rationale for producing this plot were available from the Bloodspot website.
