# Supplementary material for: MXRA7 is involved in megakaryocyte differentiation and platelet production
Source: PubMed Central journal article supplement (PMC10400050; doi:10.1097/bs9.0000000000000167), 2023-07-05
Supplement: bs9-5-160-s003.pdf [file bs9-5-160-s003.pdf]

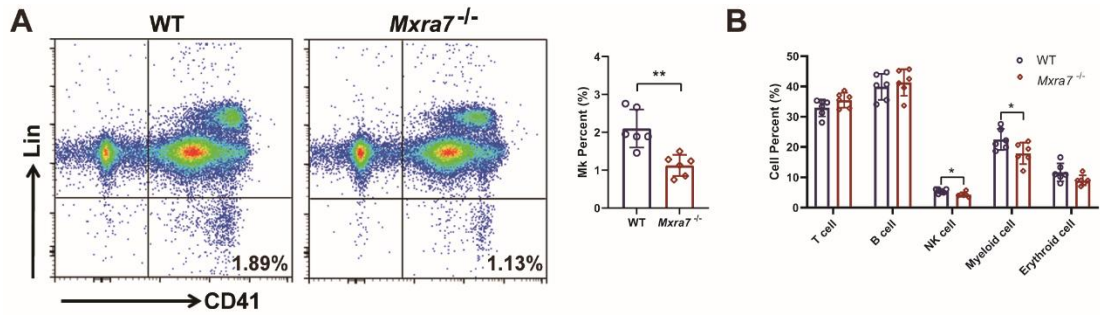

**Figure S2. The lineages of hemopoietic cells in peripheral blood.**

(A) The percentage of Mk cells in peripheral blood of WT and *Mxra7*<sup>-/-</sup> mice were analyzed by flow cytometry. (B) The percentages of T, B, NK, myeloid and erythroid cells in peripheral blood of WT and *Mxra7*<sup>-/-</sup> mice were analyzed by flow cytometry.
