# Supplementary material for: MXRA7 is involved in megakaryocyte differentiation and platelet production
Source: PubMed Central journal article supplement (PMC10400050; doi:10.1097/bs9.0000000000000167), 2023-07-05
Supplement: bs9-5-160-s004.pdf [file bs9-5-160-s004.pdf]

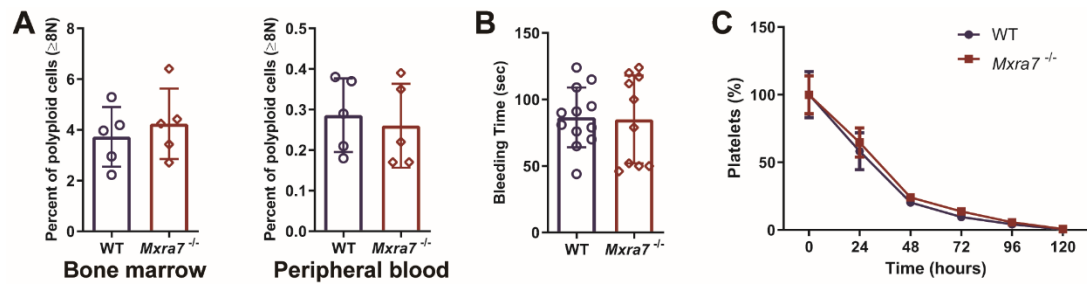

**Figure S3. The role of MXRA7 in platelet production and function.**

(A) The ploidy analysis of Mks in bone marrow and peripheral blood were detected by flow cytometry. The percentage of polyloid cells ( $\geq 8N$ ) was analyzed. (B) 5 mm of the tail tip was cut from WT and *Mxra7*<sup>-/-</sup> mice, and the tail was immediately immersed in NaCl solution. The bleeding time was recorded. (C) The platelets were isolated from WT and *Mxra7*<sup>-/-</sup> mice and labeled with calcein-AM, then the platelets were injected into WT mice by tail vein. The anticoagulant whole blood was collected and stained with anti-CD41 antibody. The percentage of platelets labeled with calcein-AM in the total platelets was analyzed with flow cytometry.
